# High carnivore population density highlights the conservation value of industrialised sites

Daan J. E. Loock<sup>a\*</sup>, Samuel T. Williams<sup>b,c\*</sup>, Kevin W. Emslie<sup>b</sup>, Wayne S. Matthews<sup>d</sup>, Lourens H. Swanepoel<sup>b</sup>

<sup>a</sup>Faculty of Natural and Agricultural Sciences, University of the Free State, 205 Nelson Mandela Drive, Park West, Bloemfontein, 930, South Africa

<sup>b</sup>Department of Zoology, School of Mathematical & Natural Sciences, University of Venda, Private Bag X5050, Thohoyandou, 0950, South Africa

<sup>c</sup>Department of Anthropology, Durham University, Durham, DH1 3LE, United Kingdom

<sup>d</sup>Department of Environmental Sciences, College of Agriculture & Environmental Sciences, University of South Africa, P.O. Box 392, Pretoria, 0003, South Africa

\*These authors contributed equally to this work, and are listed in alphabetical order

## Acknowledgements

We would like to thank Secunda Synfuels Operations Division of Sasol South Africa (Pty) Ltd. for supporting this research, the Faculty of Natural and Agricultural Science, University of the Free State, and the Wildlife Resource Association (WRA).

## 17 **Author Biographies**

18 Daan Loock is a Land & Biodiversity Manager at Secunda Synfuels Operations Division of  
19 Sasol South Africa (Pty) Ltd. He is currently involved in biodiversity studies and especially a  
20 serval research program for the last couple of years. Address: Secunda Synfuels Operations,  
21 Private Bag X1000, Secunda, 2302, South Africa. Email: [daan.loock@sasol.com](mailto:daan.loock@sasol.com).

22 Samual T. Williams is a Postdoctoral Research Fellow in the Department of Zoology at the  
23 University of Venda. His research centres around the theme of carnivores in the Anthropocene,  
24 including carnivore conservation, road ecology, and ecosystem services. Address: Department of  
25 Zoology, School of Mathematical & Natural Sciences, University of Venda, Private Bag X5050,  
26 Thohoyandou 0950, South Africa. Email: [samual.t.williams@gmail.com](mailto:samual.t.williams@gmail.com).

27 Kevin W. Emslie is an MSc. candidate in the Department of Zoology at the University of Venda.  
28 His research focuses on the impacts of human-modified landscapes on small- and mesocarnivore  
29 ecology. Address: Department of Zoology, School of Mathematical & Natural Sciences,  
30 University of Venda, Private Bag X5050, Thohoyandou 0950, South Africa. Email:  
31 [kevin.emslie@gmail.com](mailto:kevin.emslie@gmail.com).

32 Wayne S. Matthews has completed his MSc and PhD, which dealt with the vegetation and  
33 ecology of the North-eastern Mountain Sourveld, and ecology with dynamics of Sand Forest of  
34 Maputaland. Address: Wildlife Resource Association, PO Box 1288, Umhlali, 4390, South  
35 Africa. Email: [wayne@wra-africa.net](mailto:wayne@wra-africa.net).

36 Lourens H. Swanepoel is a Senior Lecturer in Conservation Biology at the Department of  
37 Zoology, University of Venda. His research interests include carnivore conservation, human  
38 carnivore conflict and ecosystem services. Address: Department of Zoology, School of  
39 Mathematical & Natural Sciences, University of Venda, Private Bag X5050, Thohoyandou 0950,  
40 South Africa. Email: [lourens.swanepoel.univen@gmail.com](mailto:lourens.swanepoel.univen@gmail.com).

## 41 **1. Abstract**

42 As the environment becomes increasingly altered by human development, the importance of  
43 understanding the ways in which wildlife interact with modified landscapes is becoming clear.  
44 Areas such as industrial sites are sometimes presumed to have little conservation value, but many  
45 of these sites have areas of less disturbed habitats around their core infrastructure, which could  
46 provide ideal conditions to support species such as mesocarnivores. We conducted the first  
47 assessments of the density of serval (*Leptailurus serval*) at the Secunda Synfuels Operations  
48 plant, South Africa. We ran three camera trap surveys to estimate serval density using a spatially  
49 explicit capture recapture framework. Servals occurred at densities of 62.33-111.55 animals per  
50 100 km<sup>2</sup>, which are the highest recorded densities for this species. Our findings highlight the  
51 significant conservation potential of industrialised sites, and we suggest that such sites could help  
52 contribute towards meeting conservation goals.

## 53 **2. Keywords**

54 anthropocene, abundance, carnivore, felidae, private land

## 55 **3. Introduction**

56 Over the last centuries, there have been rapid and intense environmental changes caused by  
57 increasing human numbers, technological advances and industrialisation (United Nations  
58 Environment Programme 2012). Human alterations on the environments have resulted in a  
59 decline in biodiversity, and are elevating extinction rates of species at a global scale (Chapin et  
60 al. 2000). Currently more than 75% of the terrestrial surface is impacted by humans (Ellis et al.  
61 2010; Ellis et al. 2013). These human activities are affecting biodiversity and ecosystems on  
62 various scales as well as modifying existing ecosystems, creating unique urban environments  
63 (Williams et al. 2009; Barbosa et al. 2010). In many cases biodiversity can be positively related

64 to human population at a regional scale due, for instance, to an enhanced spatial heterogeneity  
65 between rural and urban environments, and the introduction of exotic species (McKinney 2002;  
66 Sax and Gaines 2003). The influence of these modifications depends on both the scale and the  
67 organisms involved (Barbosa et al. 2010).

68 Even within the most densely populated and intensively used areas, including urban landscapes,  
69 humans rarely utilise all land, and tend to retain significant green or unused areas. These “green  
70 spaces” hold ecological potential, and can reduce biodiversity loss by managing habitats to  
71 support endangered species (Jackson et al. 2014), although further research is necessary to  
72 understand the impacts of these processes (Northrup and Wittemyer 2013).

73 One species that that could be impacted by development is the serval (*Leptailurus serval*). The  
74 serval is a medium-sized carnivore that feeds primarily on rodents (Ramesh and Downs 2015),  
75 and is dependent on wetland habitats (Ramesh and Downs 2015/2) that are being rapidly lost  
76 globally (Dixon et al. 2016). The species is listed as Least Concern on the global IUCN Red List  
77 of threatened species (Thiel 2015), but is considered Near Threatened in South Africa  
78 (Friedmann and Daly 2004). Serval have declined throughout their range (Ramesh and Downs  
79 2013), and the principal threats to the species are loss and degradation of their wetland habitat  
80 (Thiel 2011), trade of their skins (Kingdon and Hoffmann 2012), and persecution in response to  
81 perceived predation of poultry (Henley 1997), although they only rarely prey on livestock (Thiel  
82 2015). Data on population density and structure are critical to planning wildlife management and  
83 implementing conservation initiatives (Barrows et al. 2005), but there have been few studies on  
84 serval ecology, and conservation initiatives are hindered by poor knowledge of abundance  
85 (Ramesh and Downs 2013).

86 In this study, we firstly aimed to estimate the population density of servals at the Secunda  
87 Synfuels Operations plant, an industrial site in Mpumalanga province, South Africa, that  
88 includes natural wetland within its boundaries (Fig. 1). We also aimed to assess the structure of  
89 this serval population, in order to make inferences about population dynamics.

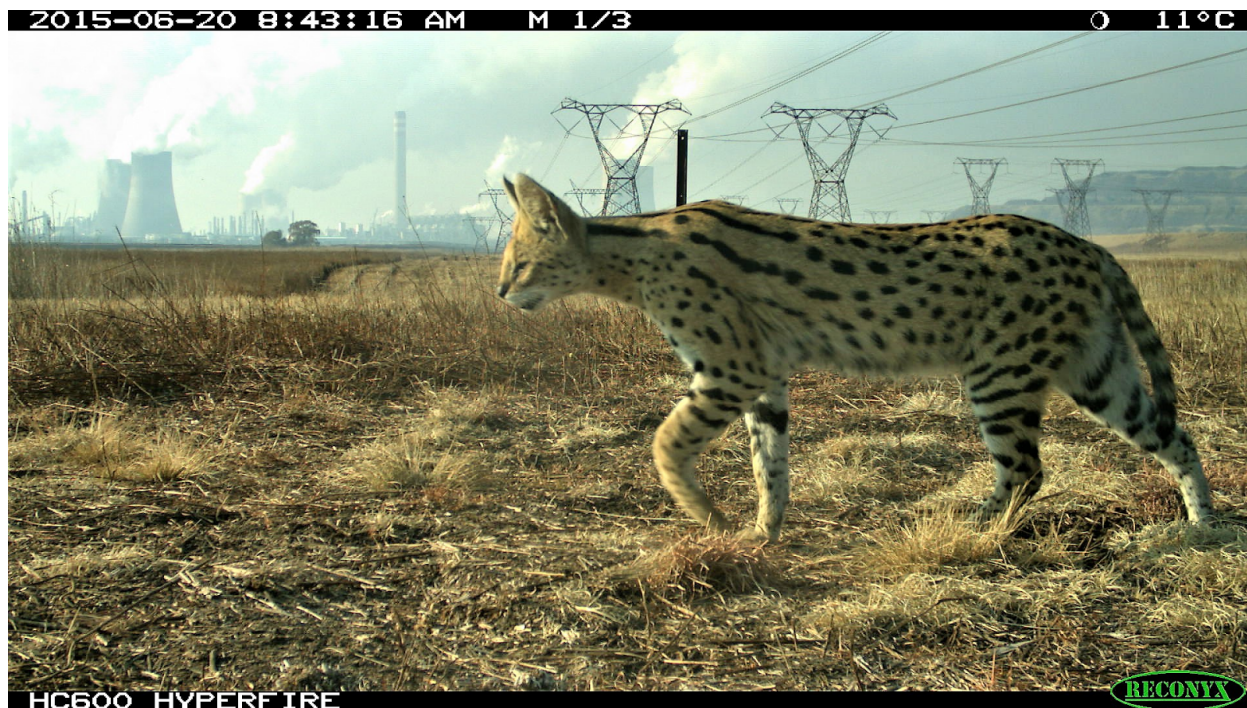

90 Fig. 1. Camera trap image of a serval at the heavily industrialised Secunda Synfuels Operations  
91 plant in South Africa, recorded by Reconyx Hyperfire HC600 camera.

## 92 **4. Materials and Methods**

### 93 **3.1. Ethics statement**

94 This project is registered at the Animal Care and Use Committee of the University of Pretoria  
95 (Ethical clearance number: EC040-14) and the Mpumalanga Tourism and Parks Agency (Permit  
96 number: 5467).

### 97 **3.2. Study Area**

98 The Secunda Synfuels Operations > Div of Sasol South Africa (PTY) Ltd, plant is located in  
99 Secunda, Mpumalanga province, South Africa (Fig. 2), and it consists of a primary area (a  
100 petrochemical plant) and a secondary area (which is made up of surrounding natural and

101 disturbed vegetation). The secondary area (hereafter referred to as the SSO) covers an area of 50  
102 km<sup>2</sup> (central coordinates 26°31'45.62" S, 29°10'31.55" E). The secondary area is a gently to  
103 moderately undulating landscape on the Highveld plateau, supporting short to medium-high,  
104 dense, tufted grasses at different levels of disturbance. In places, small scattered wetlands (both  
105 man-made and natural), narrow stream alluvia, and occasional ridges or rocky outcrops interrupt  
106 the continuous grassland cover. Much of the study site (38%) is classified as relatively  
107 untransformed habitat, which is managed in accordance to Secunda Synfuels Operations  
108 Biodiversity Management Plan, to conserve the natural areas from degradation and improve the  
109 ecological functionality of the disturbed land. The vegetation type is classified as Soweto  
110 Highveld Grassland (Rutherford et al. 2006), and the area falls into the Grassveld Biome  
111 (Mucina and Rutherford 2006). We used satellite images (Google 2014) to digitise the  
112 boundaries of four major habitat types (Disturbed, Grassland, Grass & wetland, and Wetland),  
113 which we used as site covariates in subsequent analyses.

114 The relatively unspoiled grassland represents the best form of Soweto Highveld Grassland on  
115 site. The characteristic species include *Cymbopogon pospischilii*, *Pollichia campestris*,  
116 *Walafrida densiflora*, *Eragrostis chloromelas*, *Gomphrena celosioides*, *Craibia affinis* and  
117 *Cineraria cf. savifraga* (Matthews 2016). The grassland habitat has a low basal cover due to  
118 grazing and during the rainy season the grass phytomass averages around 3-4 tons per hectare  
119 (de Wet 2016). The grass and wetland habitat occurs mostly within the transition zones or dry  
120 floodplains not typical of either wetland habitat or grassland habitat. These areas have a medium  
121 cover, and include some species typical to wetlands. The wetland habitat is dominated by species  
122 indicative of wetland zones and moist soils (Linström 2012). The phytomass here can be in  
123 excess of 5 tonnes per hectare, and the growth is up to 1.5 meters above the ground level. The  
124 disturbed habitat is dominated by weedy forbs with medium to very high density. The impact of  
125 the weedy forbs is a thicket of basal cover on the surface and up to 1.5 meters above ground  
126 level.

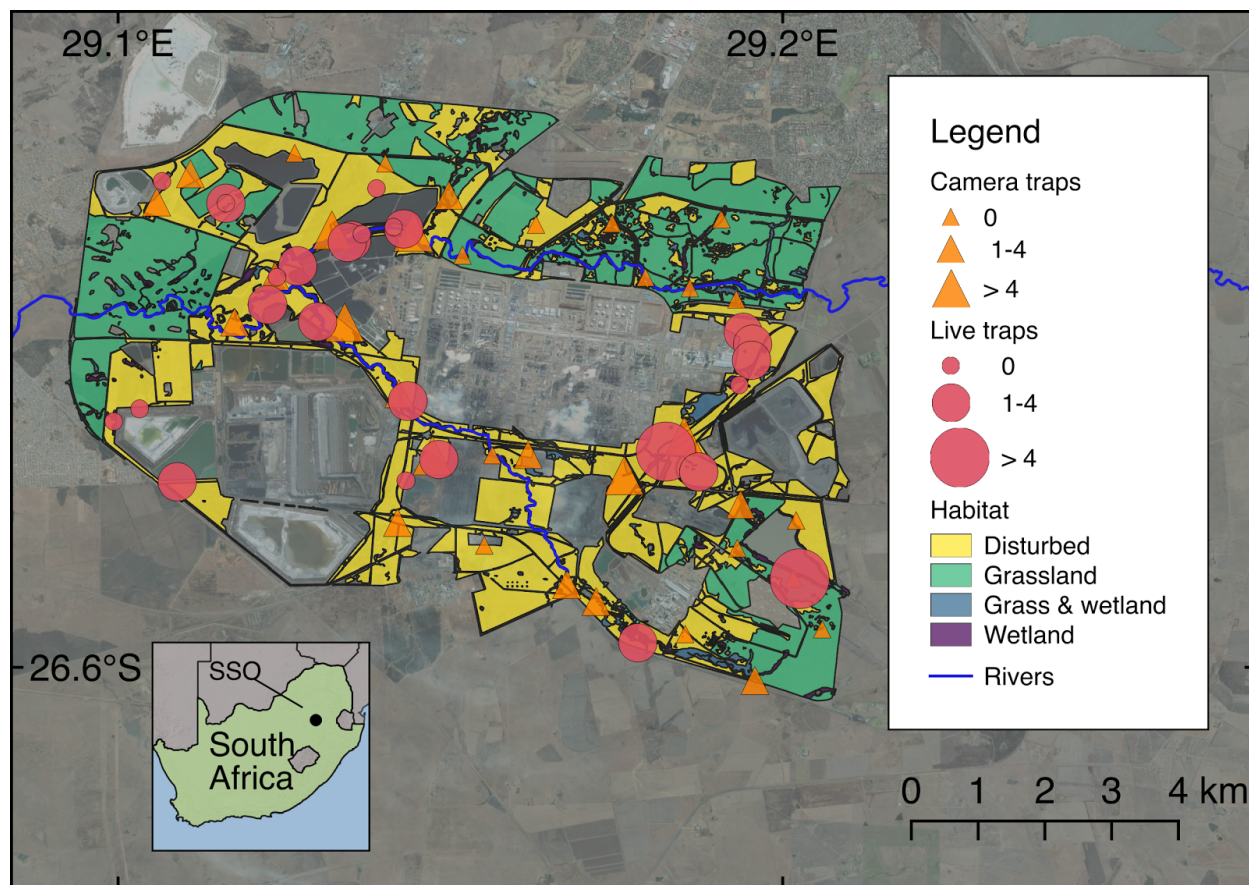

127 Fig. 2. Map showing the locations of camera traps and live traps at the Secunda Synfuels  
128 Operations plant in South Africa. The size of points representing camera traps and live traps  
129 diameter is proportional to the number of individual serval captured. Major habitat types are also  
130 shown, along with satellite images illustrating the human-modified landscapes. Wetland and  
131 Grass & wetland habitat types are difficult to visualise at this scale as they occur in very close  
132 proximity to rivers.

### 133 3.3. Camera trapping

134 The study was underpinned by spatially explicit capture-recapture (SECR) framework. We  
135 established an array of Reconyx Hyperfire HC600 camera traps at 34 camera trap stations over  
136 an area of 79.4 km<sup>2</sup> throughout the study site (Fig. 2). We separated camera traps with an average  
137 of 1.2 km (maximum 2.1 km), which was based on the home range size of serval (Ramesh et al.

138 2015). The study area of 79.4 km<sup>2</sup> is approximately two to three times the maximum area of  
139 serval home range (Bowland 1990). The camera trapping area is therefore adequate (greater than  
140 the home range size of male serval) to allow for robust density estimates using SECR framework  
141 (Tobler and Powell 2013).

142 We placed camera traps on game trails and roads to maximise the probability of photographing  
143 servals, and to facilitate access for camera maintenance. We mounted camera traps on fence  
144 posts, 50 cm above the ground and 1 to 2 m from the trail. Vegetation in front of the camera traps  
145 was cleared to reduce the rate of false triggers of the motion detector.

146 We conducted three surveys from 2014 to 2015, with each survey running for 40 days (see Table  
147 1 for dates). Camera traps were programmed to operate 24 hours per day, with a one minute  
148 delay between detections. Camera trap positions were kept constant within each survey and  
149 between surveys. We visited each camera trap on a weekly basis to download the images, change  
150 batteries, and ensure the cameras remained in working order. Camera Base 1.4 (Tobler 2010) was  
151 used to manage the images collected by the camera traps. We identified servals manually using  
152 individual markings such as spot patterns and scars.

### 153 3.4. Live trapping

154 Live trapping formed part of a larger study investigating serval spatial and disease ecology. We  
155 used the live trapping data to record the capture rate and population structure of the serval  
156 population at the study site to validate our camera trapping study. Serval were trapped using 16  
157 steel trap cages measuring 200 cm x 80 cm x 80 cm, deployed at 29 trap sites throughout the  
158 study site. Traps were baited with helmeted guineafowl (*Numida meleagris*) for a total of 287  
159 trap nights between 2014 and 2017. Servals were immobilised by a veterinarian using one of the  
160 following drug combinations: 1) KBM-5: ketamine (5.0 mg kg<sup>-1</sup>), butorphanol (0.2 mg kg<sup>-1</sup>), and  
161 medetomidine (0.08 mg kg<sup>-1</sup>); 2) KBM-8: ketamine (8.0 mg kg<sup>-1</sup>), butorphanol (0.2 mg kg<sup>-1</sup>), and  
162 medetomidine (0.08 mg kg<sup>-1</sup>); 3) ZM: zoletil (5.0 mg kg<sup>-1</sup>) and medetomidine (0.065 mg kg<sup>-1</sup>); 4)  
163 AM: alfaxalone (0.5 mg kg<sup>-1</sup>) and medetomidine (0.05 mg kg<sup>-1</sup>); or 5) ABM: alfaxalone (2.0 mg



164 kg<sup>-1</sup>), butorphanol (0.2 mg kg<sup>-1</sup>), and medetomidine (0.08 mg kg<sup>-1</sup>) ([Blignaut et al. in review](#)).  
165 Drugs were administered intramuscularly using a blowpipe. If serval showed signs of inadequate  
166 drug dosages, they were topped-up with the same combinations. Where administered,  
167 medetomidine and butorphanol were pharmacologically antagonised with atipamezole (5 mg  
168 mg<sup>-1</sup> medetomidine) and naltrexone (2 mg mg<sup>-1</sup> butorphanol), respectively. After examination,  
169 animals were released at the same site where they were captured.

170 Animals with a mass of 3-8 kg were considered to be juveniles (up to approximately six months  
171 old, to the stage where the canines are developed). Servals with a mass of 8-11 kg were  
172 categorised as sub-adults (6-12 months old, just before they are sexually mature). Animals 11-15  
173 kg (approximately 12 to 18 months and older) were considered to be adults (Sunquist and  
174 Sunquist 2002).

### 175 3.5. Data analysis

176 We estimated serval density by fitting likelihood based SECR (Efford 2004) models to camera  
177 trap data using the package secr (Efford 2017) in R version 3.4.3 (R Development Core Team  
178 2017). The advantage of SECR models over traditional density estimation methods is that they  
179 do not require the use of subjective effective trapping areas, and instead estimate density directly  
180 (Tobler and Powell 2013). This is achieved by estimating the potential animal activity centres in  
181 a predefined area using spatial location data from the camera traps (Efford 2004). The spacing of  
182 the activity centres is related to the home range size of the animals, and as such the detection  
183 probability of each animal is a function of the distance from the camera trap to the activity  
184 centre. Detection is modelled using a spatial detection function which is governed by two  
185 parameters; the encounter rate at the activity centre (detection probability;  $\lambda_0$ ) and a scale  
186 parameter ( $\sigma$ ) which describes how the encounter rate declines with increased distance from the  
187 activity centre (Efford 2004). We tested for three different spatial detection functions;  
188 half-normal, hazard and exponential. We ranked models based on Akaike information criterion  
189 (AIC), and found overwhelming support for the hazard rate spatial detection function (Table S1).

190 All subsequent models were fitted with the hazard rate detection function.

191 We fitted SECR models by maximising the full likelihood where the scale parameter was kept  
192 constant, but we let the encounter rate vary by biologically plausible hypotheses. The scale  
193 parameter is largely affected by home range size, and hence the sex of the animal (Sollmann et  
194 al. 2011/3). However, we were unable to determine the sex of individual serval from the  
195 photographs, and could therefore not model variation in the scale parameter. We first fitted a  
196 model in which serval showed a behavioural response at  $\lambda_0$ , as animals can become trap happy  
197 or trap shy (Wegge et al. 2004). Secondly, we tested the effect of habitat on  $\lambda_0$ , as serval prefer  
198 wetlands (Bowland 1990), which would result in higher detections in these habitats. We captured  
199 camera-specific habitat variables from the vegetation classification. Thirdly, we coded each year  
200 and season as a separate session, and used the multi-session framework in `secr` to test the effect  
201 of season on serval density, with constant  $\lambda_0$ . We lastly fitted a model in which  $\lambda_0$  varied with  
202 both season and habitat type. These models were contrasted against a null model, in which all  
203 variables were kept constant.

204 We used AIC to rank models, considering models with  $\Delta\text{AIC} < 2$  to have equal support  
205 (Burnham and Anderson 2004). The buffer width for analysis was set at 3,000 m, which resulted  
206 in the inclusion of an informal housing settlement and a residential area in the state space buffer.  
207 Since it is highly unlikely that serval will utilise these areas (as well as the primary industrial  
208 area) we excluded these areas from the state space buffer (Fig. S1). All data and R code used for  
209 analysis are available in (Loock et al. 2018).

## 210 **4. Results**

### 211 **4.1. Camera trapping**

212 During a camera trapping effort of 3,590 trap days, we photographed a total 61 serval spanning  
213 three separate sessions (Table 1). The number of individual serval captures did not differ greatly  
214 between sessions, although the highest number was captured during the wet period of 2015

215 (Table S3, Fig. S2).

216 The two most parsimonious SECR models ( $\Delta AIC < 2$ ) both indicated that the encounter rate ( $\lambda_0$ ) was affected by habitat type (Table S4). There was also strong support that serval density is  
217 session dependant ( $\Delta AIC = 0.098$ ;  $w = 0.487$ ; Table S3). To estimate serval density we therefore  
218 fitted an SECR model with density dependent on session (a proxy for season and year  
219 combination) and encounter rates dependent on habitat type. Serval population density estimates  
220 at SSO varied from 62.33 (SE=16.03) to 111.55 (SE=22.76) animals per 100 km<sup>2</sup> (Fig. 3a).  
221 Highest estimates were recorded during the dry seasons (Winter 2014: 111.55 [SE=22.76] &  
222 Winter 2015: 103.06 [SE=21.76]) compared to the single summer season (Summer 2015: 62.33  
223 [SE=160.3]; Fig. 3a). Vegetation type had a significant effect on serval encounter rates, where  
224 grassland had the lowest encounter rate (0.04 [SE=0.01]) compared to wetlands with the highest  
225 (0.19 [SE=0.03]; Fig. 3b).  
226

227 Table 1. Details of serval camera trapping surveys conducted at SSO in Mpumalanga province,  
228 South Africa, in 2014 and 2015.

| Survey       | Starting date | End date   | Camera trap nights | Survey area (km <sup>2</sup> ) | Number of serval photographic captures | Number of individual serval photographed |
|--------------|---------------|------------|--------------------|--------------------------------|----------------------------------------|------------------------------------------|
| Winter 2014  | 2014/08/05    | 2014/09/14 | 1,105              | 79.4                           | 332                                    | 22                                       |
| Summer 2015  | 2015/02/21    | 2015/04/02 | 1,333              | 79.4                           | 580                                    | 34                                       |
| Winter 2015  | 2015/06/20    | 2015/07/30 | 1,152              | 79.4                           | 672                                    | 31                                       |
| <i>Total</i> |               |            | 3,590              | 79.4                           | 1,584                                  | 61                                       |

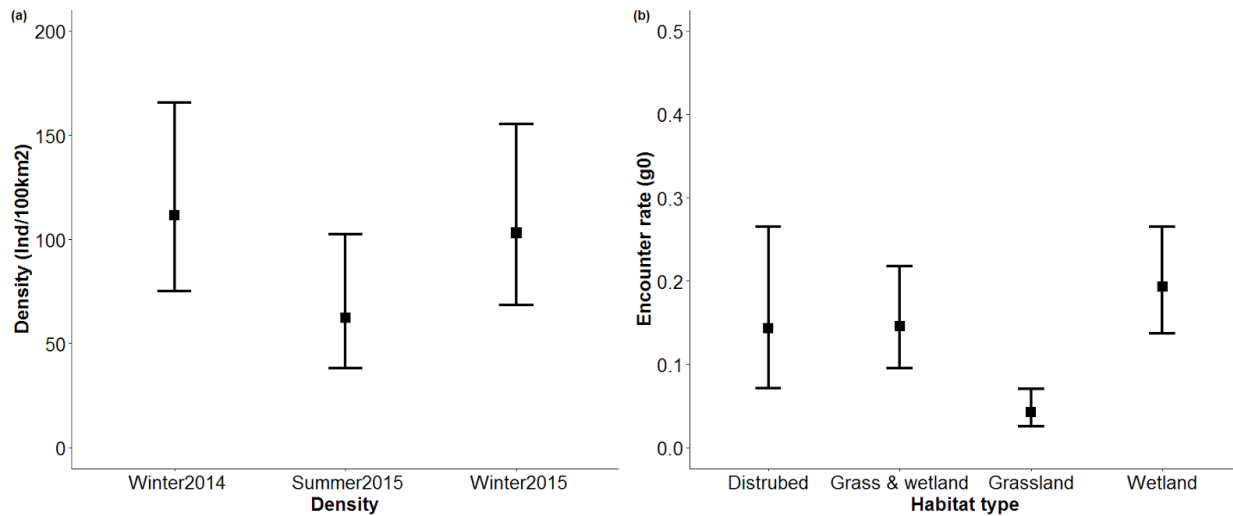

274 Fig. 3. Serval density estimates for each camera trap survey conducted at SSO indicating a)  
275 influence of season on density, and b) effect of habitat type on serval encounter rate.

#### 276 4.2. Live trapping

277 We captured 65 individuals, of which four were also recaptured on a second occasion. This  
278 comprised of a total of 26 adult males, 19 adult females, 11 sub-adults, and seven juvenile  
279 animals. This resulted in a mean trapping success rate of 0.21 captures per trap night (excluding  
280 recaptures). Trapping success rate varied little between sessions (Fig. 4).

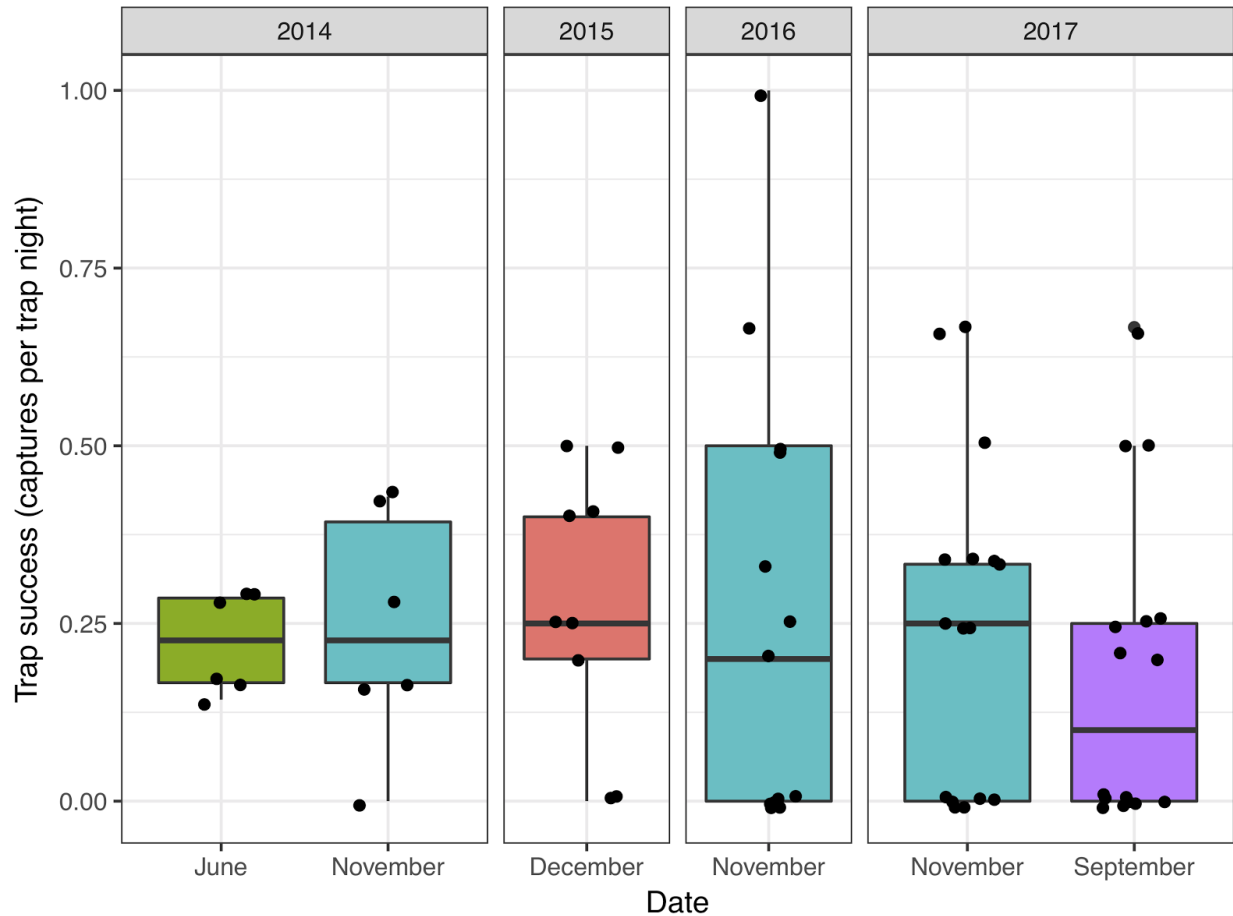

281 Fig. 4. Box plot showing trap success rate for serval captures at SSO from 2014 to 2017.

## 282 5. Discussion

### 283 5.1. Comparative serval density

284 In our three camera trap surveys at SSO, we estimated serval population density to be 111.55,  
285 62.33, and 103.06 animals per 100 km<sup>2</sup>, which are the highest densities recorded in the literature.  
286 Although there are no data available for serval live trapping rates, rates of 0.0015-0.017 captures  
287 per trap night are much more typical for other mesocarnivores such as jaguarundi (*Puma*  
288 *yagouaroundi*), oncilla (*Leopardus tigrinus*), tayra (*Eira barbara*), and feral cat (*Felis silvestris*  
289 *catus*) using cage traps (Molsher 2001; Michalski et al. 2007; McGregor, H W, Hampton J O,

290 Lisle, D, Legge, S 2016), which are an order of magnitude lower than serval live capture rates at  
291 SSO (0.21 captures per trap night). Although great care must be taken when comparing trapping  
292 rates between different locations and species, the live trap rates at SSO nevertheless appear to be  
293 consistently very high, which supports the high population densities estimated using camera trap  
294 data.

295 Our high estimates of serval densities at SSO contrast with more typical densities reported in  
296 Luambe National Park in Zambia (9.9 animals per 100 km<sup>2</sup> (Thiel 2011), Bwindi Impenetrable  
297 National Park in Uganda (9 animals per 100 km<sup>2</sup> (Andama (2000), cited in Kingdon and  
298 Hoffmann 2012)), and on farmland in the Drakensberg Midlands, South Africa (6.5 animals per  
299 100 km<sup>2</sup> (Ramesh and Downs 2013)). However, there is evidence that serval can attain such high  
300 densities. For example, Geertsema (1985) reported a serval density of 41.66 animals per 100 km<sup>2</sup>  
301 in the Ngorongoro Crater, Tanzania.

302 High population densities of other carnivore species have also been reported in human-modified  
303 habitats such as urban areas. Coyotes (*Canis latrans*), raccoons (*Procyon lotor*), red foxes  
304 (*Vulpes vulpes*), and Eurasian badgers (*Meles meles*), for example, all thrive in urban landscapes  
305 (Bateman and Fleming 2012; Scott et al. 2014). Carnivore species able to adapt to urban  
306 environments often succeed in these areas due to high food availability, favourable climatic  
307 effects, and the reduced threat of intraguild predation because of the absence of larger apex  
308 predators (Fuller et al. 2010). We provide several, not necessarily mutually exclusive theories, to  
309 explain the high serval density we observed at SSO.

310 Firstly, servals in the SSO are protected from persecution. Such persecution can have large  
311 effects on carnivore densities. For example leopards (*Panthera pardus*) in livestock/game  
312 farming areas only attain around 20% of their potential density compared to protected areas free  
313 from persecution (Balme et al. 2010). Servals outside protected areas are frequently persecuted  
314 by livestock farmers (Henley 1997) as they are often mistakenly blamed for livestock predation  
315 (Skinner and Chimimba 2005), but at SSO this is not the case, which could lead to higher  
316 population densities (Cardillo et al. 2004). Secondly, servals are the largest remaining carnivore  
317 species occurring at ecologically effective densities at SSO, so there is little interspecific

318 competition from larger carnivores. In other areas, the presence of other medium- and  
319 large-bodied carnivores could otherwise limit serval population densities (through intraguild  
320 predation), so their absence can lead to mesopredator release, such as through increased survival  
321 of young (Ritchie and Johnson 2009). For example, the absence of large carnivores such as lions  
322 (*Panthera leo*) and spotted hyaenas (*Crocuta crocuta*) in northern South Africa is thought to  
323 have led to the competitive release of cheetahs (*Acinonyx jubatus*) (Marnewick et al. 2007).  
324 Thirdly, the abundance of disturbed habitat at SSO could also facilitate high serval population  
325 density. Disturbed habitat can be highly productive (Williams et al. 2018), and provide shelter  
326 and food resources for species such as rodents that serval prey upon (Taylor 2013), providing  
327 abundant food and in turn supporting a high abundance of serval.

328 Although the population density of serval recorded at SSO was exceptionally high, the structure  
329 of this serval population was similar to those at other sites. The number of adult males per 100  
330 adult females captured in live traps at SSO was 137, which is within the range reported in the  
331 literature (50-220 in KwaZulu-Natal ((Bowland 1990; Ramesh et al. 2016); 100 in the  
332 Ngorongoro Crater, Tanzania (Geertsema 1985)). Similarly, the proportion of the population at  
333 SSO that was comprised of juvenile and sub-adult individuals (0.69) was very similar to other  
334 populations (0.64 in the Ngorongoro crater; (Geertsema 1985)). It therefore appears that although  
335 the serval population density at SSO is very high, the structure of the population is not unusual,  
336 which is not indicative of a rapidly declining or increasing population size (Harris et al. 2008),  
337 supporting our findings that the serval population density at the study site appears to be relatively  
338 stable.

339 Although servals appear to thrive in close proximity to such a heavily industrialised site, we  
340 suggest that further research is conducted to identify any potential effects of industrial activity  
341 (Raiter et al. 2014), such as the influence of noise and air pollution on the physiology and  
342 behaviour of wildlife in the vicinity (Morris-Drake et al. 2017).

## 343 5.2. The impacts of modified landscapes

344 In recent years the expansion of infrastructure has progressed more rapidly than during any other  
345 period in history (Laurance et al. 2015), and industrial sites such as mines and fossil fuel  
346 processing plants are not the only developments that could have impacts on wildlife. The  
347 growing road network, for example (Ibisch et al. 2016), has large direct and indirect ecological  
348 impacts such as causing wildlife-vehicle collisions, polluting the environment, disrupting animal  
349 migrations and gene flow, and providing access to invading species and humans, facilitating  
350 further degradation (Laurance et al. 2009; Sloan et al. 2016). The rapidly growing number of  
351 hydroelectric dams (Zarfl et al. 2014) increases the risk of habitat fragmentation through  
352 deforestation, in addition to disrupting freshwater ecosystems (Finer and Jenkins 2012).  
353 Similarly, the development of urban and agricultural areas fragments and destroys habitats  
354 (Ripple et al. 2014). Consequently, delineating how the changing environment affects  
355 biodiversity will be an increasingly important theme of future research.

356 But not all the impacts of anthropogenic development on wildlife are negative. The high serval  
357 densities at SSO are remarkable as the site is very heavily industrialised. Nature reserves and  
358 exclusion zones surrounding industrialised areas such as SSO have the potential to balance  
359 resource utilisation with biodiversity conservation (Edwards et al. 2014). Some industrial  
360 installations such as mines have created nature reserves, which can benefit biodiversity  
361 conservation. The Mbalam iron ore mine in Cameroon has set aside land to protect rare forest  
362 mammals (Edwards et al. 2014). Private nature reserves created around the Venetia diamond  
363 mine in South Africa and the Jwaneng diamond mine in Botswana support a broad complement  
364 of large mammals including elephants (*Loxodonta africana*), lions (*Panthera leo*), leopards  
365 (*Panthera pardus*), cheetahs, African wild dogs (*Lycaon pictus*), brown hyaenas (*Hyaena*  
366 *brunnea*), and black-backed jackals (*Canis mesomelas*) (Smallie and O'connor 2000; Kamler et  
367 al. 2007; Houser et al. 2009; Jackson et al. 2014). The Sperrgebiet exclusion zone in Namibia,  
368 established to protect diamond deposits (Edwards et al. 2014), has now been proclaimed a  
369 National Park (Wiesel 2010). The consequent changes in the ecological functions of these human  
370 modified areas can produce a new combination of species, sometimes modifying and, in many



371 cases, increasing the local richness (Hobbs et al. 2006; Pautasso et al. 2011).  
372 Studies such as this highlight the complexity of the relationship between wildlife and the  
373 human-modified environment, and suggest that the potential conservation value of industrialised  
374 sites should not be overlooked. This underscores the importance of sound ecological  
375 management in these areas. Such sites could be incorporated into wildlife management plans,  
376 and could help to achieve goals such as the conservation of threatened species. This could be  
377 achieved, for example, through the formation of partnerships between industry and the non-profit  
378 sector or governmental agencies, such as the partnership between Eskom and the Endangered  
379 Wildlife Trust (EWT) to reduce the threats posed by electricity infrastructure to wildlife in South  
380 Africa (Jenkins et al. 2010).

## 381 **6. Conclusion**

382 Servals occur at much greater densities at SSO than have been recorded elsewhere. Capture rates  
383 on both camera traps and live traps were remarkably high. High densities may be due to  
384 favourable conditions such as a high abundance of rodent prey and the absence of persecution or  
385 competitor species. Despite the highly industrialised nature of the site, serval population  
386 structure appears to be similar to other natural sites. We suggest that the potential value of  
387 industrial sites, where they include areas of relatively natural habitats, may be underappreciated  
388 by conservationists, and that these sites could help meet conservation objectives.

## 389 **7. References**

- 390 Balme, G. A., R. Slotow, and L. T. B. Hunter. 2010. Edge effects and the impact of non-protected areas in  
391 carnivore conservation: leopards in the Phinda-Mkhuze Complex, South Africa. *Animal*  
392 *Conservation* 13: 315–323. doi:10.1111/j.1469-1795.2009.00342.x.
- 393 Barbosa, A. M., D. Fontaneto, L. Marini, and M. Pautasso. 2010. Positive regional species–people  
394 correlations: a sampling artefact or a key issue for sustainable development? *Animal Conservation*  
395 13: 446–447. doi:10.1111/j.1469-1795.2010.00402.x.
- 396 Barrows, C. W., M. B. Swartz, W. L. Hodges, M. F. Allen, J. T. Rotenberry, B.-L. Li, T. A. Scott, and X.  
397 Chen. 2005. A framework for monitoring multiple-species conservation plans. *Journal of Wildlife*  
398 *diseases* 69: 1333–1345. doi:10.2193/0022-541X(2005)69[1333:AFFMMC]2.0.CO;2.

- 399 Bateman, P. W., and P. A. Fleming. 2012. Big city life: carnivores in urban environments. *Journal of*  
400 *Zoology* 28: 1–23. doi:10.1111/j.1469-7998.2011.00887.x.
- 401 Blignaut, C, Steenkamp, G, Hewlett, J, Loock, D, Emslie, R, Zeiler, G E. Preliminary findings of  
402 free-ranging serval (*Leptailurus serval*) chemical capture.
- 403 Bowland, J. M. 1990. Diet, home range and movement patterns of serval on farmland in Natal. MSc  
404 thesis, University of Natal.
- 405 Cardillo, M., A. Purvis, W. Sechrest, J. L. Gittleman, J. Bielby, and G. M. Mace. 2004. Human population  
406 density and extinction risk in the world's carnivores. *PLoS Biology* 2: E197.  
407 doi:10.1371/journal.pbio.0020197.
- 408 Chapin, F. S., E. S. Zavaleta, V. T. Eviner, R. L. Naylor, P. M. Vitousek, H. L. Reynolds, D. U. Hooper, S.  
409 Lavorel, et al. 2000. Consequences of changing biodiversity. *Nature* 405: 234–242.  
410 doi:10.1038/35012241.
- 411 Dixon, M. J. R., J. Loh, N. C. Davidson, C. Beltrame, R. Freeman, and M. Walpole. 2016. Tracking  
412 global change in ecosystem area: The Wetland Extent Trends index. *Biological Conservation* 193:  
413 27–35. doi:10.1016/j.biocon.2015.10.023.
- 414 Edwards, D. P., S. Sloan, L. Weng, P. Dirks, J. Sayer, and W. F. Laurance. 2014. Mining and the African  
415 Environment. *Conservation Letters* 7: 302–311. doi:10.1111/conl.12076.
- 416 Efford, M. 2004. Density estimation in live-trapping studies. *Oikos* 106: 598–610.  
417 doi:10.1111/j.0030-1299.2004.13043.x.
- 418 Efford, M. G. 2017. *secr: spatially explicit capture-recapture models. R package version 3.1.3. Available*  
419 *from <https://cran.R-project.org/package=secr>.*
- 420 Ellis, E. C., K. Klein Goldewijk, S. Siebert, D. Deborah Lightman, and N. Ramankutty. 2010.  
421 Anthropogenic transformation of the biomes, 1700 to 2000. *Global Ecology and Biogeography* 19:  
422 589–606. doi:10.1111/j.1466-8238.2010.00540.x/full.
- 423 Ellis, E. C., J. O. Kaplan, D. Q. Fuller, S. Vavrus, K. Klein Goldewijk, and P. H. Verburg. 2013. Used  
424 planet: a global history. *Proceedings of the National Academy of Sciences* 110: 7978–7985.  
425 doi:10.1073/pnas.1217241110.
- 426 Finer, M., and C. N. Jenkins. 2012. Proliferation of hydroelectric dams in the Andean Amazon and  
427 implications for Andes-Amazon connectivity. *PLoS One* 7: e35126.  
428 doi:10.1371/journal.pone.0035126.
- 429 Friedmann, Y., and B. Daly. 2004. *Red data book of the mammals of South Africa: a conservation*  
430 *assessment*. Johannesburg: Endangered Wildlife Trust.
- 431 Fuller, T., S. Destefano, and P. S. Warren. 2010. Carnivore behavior, ecology and relationship to  
432 urbanization. In *Urban Carnivores: Ecology, Conflict, and Conservation*, ed. S. D. Gehrt, S. P. D.  
433 Riley, and B. L. Cypher, 13–20. Baltimore: Johns Hopkins University Press.
- 434 Geertsema, A. A. 1985. Aspects of the ecology of the serval *Leptailurus Serval* in the Ngorongoro Crater,  
435 Tanzania. *Netherlands Journal of Zoology* 35: 527–610. doi:10.1163/002829685X00217.
- 436 Google. 2014. Satellite imagery. Sources: CNES/Airbus. Image date 01 May 2014. Accessed May 10,  
437 2014. Available from <https://www.google.co.za/maps>.
- 438 Harris, N. C., M. J. Kauffman, and L. S. Mills. 2008. Inferences about ungulate population dynamics  
439 derived from age ratios. *Journal of wildlife management* 72: 1143–1151. doi:10.2193/2007-277.
- 440 Henley, S. 1997. *On the proposed reintroduction of serval (Felis serval) into the Great Fish River*  
441 *Reserve, Eastern Cape*. Port Elizabeth: University of Port Elizabeth.
- 442 Hobbs, R. J., S. Arico, J. Aronson, J. S. Baron, P. Bridgewater, V. A. Cramer, P. R. Epstein, J. J. Ewel, et  
443 al. 2006. Novel ecosystems: theoretical and management aspects of the new ecological world order.  
444 *Global Ecology and Biogeography* 15: 1–7. doi:10.1111/j.1466-822X.2006.00212.x.
- 445 Houser, A., M. J. Somers, and L. K. Boast. 2009. Home Range Use of Free-Ranging Cheetah on Farm

- 446 and Conservation Land in Botswana. *South African Journal of Wildlife Research* 39: 11–22.  
447 doi:10.3957/056.039.0102.
- 448 Ibisch, P. L., M. T. Hoffmann, S. Kreft, G. Pe'er, V. Kati, L. Biber-Freudenberger, D. A. DellaSala, M. M.  
449 Vale, et al. 2016. A global map of roadless areas and their conservation status. *Science* 354:  
450 1423–1427. doi:10.1126/science.aaf7166.
- 451 Jackson, C. R., R. J. Power, R. J. Groom, E. H. Masenga, E. E. Mjinga, R. D. Fyumagwa, E. Røskaft, and  
452 H. Davies-Mostert. 2014. Heading for the hills: risk avoidance drives den site selection in African  
453 wild dogs. *PLoS One* 9: e99686. doi:10.1371/journal.pone.0099686.
- 454 Jenkins, A. R., J. J. Smallie, and M. Diamond. 2010. Avian collisions with power lines: a global review of  
455 causes and mitigation with a South African perspective. *Bird conservation international* 20.  
456 Cambridge University Press: 263–278. doi:10.1017/S0959270910000122.
- 457 Kamler, J. F., H. T. Davies-Mostert, L. Hunter, and D. W. Macdonald. 2007. Predation on black-backed  
458 jackals (*Canis mesomelas*) by African wild dogs (*Lycaon pictus*). *African Journal of Ecology* 45:  
459 667–668. doi:10.1111/j.1365-2028.2007.00768.x.
- 460 Kingdon, J., and M. Hoffmann, ed. 2012. *Mammals of Africa*. New York: Bloomsbury.
- 461 Kintisch, E. 2008. The greening of synfuels. *Science* 320: 306–308. doi:10.1126/science.320.5874.306.
- 462 Laurance, W. F., M. Goosem, and S. G. W. Laurance. 2009. Impacts of roads and linear clearings on  
463 tropical forests. *Trends in Ecology & Evolution* 24: 659–669. doi:10.1016/j.tree.2009.06.009.
- 464 Laurance, W. F., A. Peletier-Jellema, B. Geenen, H. Koster, P. Verweij, P. Van Dijk, T. E. Lovejoy, J.  
465 Schleicher, et al. 2015. Reducing the global environmental impacts of rapid infrastructure expansion.  
466 *Current Biology: CB* 25: R259–62. doi:10.1016/j.cub.2015.02.050.
- 467 Linström, A. 2012. *Sasol: Secunda wetland study*. Wet Earth Eco-Specs, Lydenburg.
- 468 Loock, D., S. Williams, K. Emslie, M. Somers, W. S. Matthews, and L. Swanepoel. 2018. Serval  
469 (*Leptailurus serval*) camera trap and live trap dataset at Secunda, South Africa. Figshare. Accessed  
470 12 Jan 2018. Available from <https://figshare.com/s/bec3a5d725d8c11a5842>.  
471 doi:10.6084/m9.figshare.5729124.
- 472 Marnewick, K., A. Beckhelling, D. Cilliers, E. Lane, G. Mills, K. Herring, P. Caldwell, R. Hall, et al.  
473 2007. The status of the cheetah in South Africa. *Cat News Special Issue 3 – Cheetahs in Southern*  
474 *Africa*: 22–31.
- 475 Matthews, W. S. 2016. *Baseline assessment of state of terrestrial flora for the “secondary area” of the*  
476 *SASOL Secunda site. Part of the state of biodiversity assessment – WetEarth*. WSM Eco Services,  
477 Nelspruit.
- 478 McGregor, H W, Hampton J O, Lisle, D, Legge, S. 2016. Live-capture of feral cats using tracking dogs  
479 and darting, with comparisons to leg-hold trapping. *Wildlife Research* 43: 313–322.  
480 doi:10.1071/WR15134.
- 481 McKinney, M. L. 2002. Urbanization, biodiversity, and conservation: the impacts of urbanization on  
482 native species are poorly studied, but educating a highly urbanized human population about these  
483 impacts can greatly improve species conservation in all ecosystems. *BioScience* 52: 883–890.  
484 doi:10.1641/0006-3568(2002)052[0883:UBAC]2.0.CO;2.
- 485 Michalski, F., P. G. Crawshaw Jr, T. G. de Oliveira, and M. E. Fabián. 2007. Efficiency of box-traps and  
486 leg-hold traps with several bait types for capturing small carnivores (mammalia) in a disturbed area  
487 of southeastern Brazil. *Revista de Biologia Tropical* 55. scielo.sa.cr: 315–320.
- 488 Molsher, R. L. 2001. Trapping and demographics of feral cats (*Felis catus*) in central New South Wales.  
489 *Wildlife Research* 28: 631–636. doi:10.1071/WR00027.
- 490 Morris-Drake, A., A. M. Bracken, and J. M. Kern. 2017. Anthropogenic noise alters dwarf mongoose  
491 responses to heterospecific alarm calls. *Environmental Pollution* 223, 476-483.
- 492 Mucina, L., and M. C. Rutherford. 2006. *The vegetation of South Africa, Lesotho and Swaziland*. Pretoria:

- 493 South African National Biodiversity Institute.
- 494 Northrup, J. M., and G. Wittemyer. 2013. Characterising the impacts of emerging energy development on  
495 wildlife, with an eye towards mitigation. *Ecology letters* 16: 112–125. doi:10.1111/ele.12009.
- 496 Pautasso, M., K. Böhning-Gaese, P. Clergeau, V. R. Cueto, M. Dinetti, E. Fernández-Juricic, M.-L.  
497 Kaisanlahti-Jokimäki, J. Jokimäki, et al. 2011. Global macroecology of bird assemblages in  
498 urbanized and semi-natural ecosystems. *Global ecology and Biogeography* 20: 426–436.  
499 doi:10.1111/j.1466-8238.2010.00616.x.
- 500 Raiter, K. G., H. P. Possingham, S. M. Prober, and R. J. Hobbs. 2014. Under the radar: mitigating  
501 enigmatic ecological impacts. *Trends in Ecology & Evolution* 29: 635–644.  
502 doi:10.1016/j.tree.2014.09.003.
- 503 Ramesh, T., and C. T. Downs. 2015/2. Impact of land use on occupancy and abundance of terrestrial  
504 mammals in the Drakensberg Midlands, South Africa. *Journal for Nature Conservation* 23: 9–18.  
505 doi:10.1016/j.jnc.2014.12.001.
- 506 Ramesh, T., and C. T. Downs. 2013. Impact of farmland use on population density and activity patterns of  
507 serval in South Africa. *Journal of Mammalogy* 94: 1460–1470. doi:10.1644/13-MAMM-A-063.1.
- 508 Ramesh, T., and C. T. Downs. 2015. Diet of serval (*Leptailurus serval*) on farmlands in the Drakensberg  
509 Midlands, South Africa. *Mammalia* 79, 399-407. doi:10.1515/mammalia-2014-0053.
- 510 Ramesh, T., R. Kalle, and C. T. Downs. 2015. Sex-specific indicators of landscape use by servals:  
511 Consequences of living in fragmented landscapes. *Ecological Indicators* 52: 8–15.  
512 doi:10.1016/j.ecolind.2014.11.021.
- 513 Ramesh, T., R. Kalle, and C. T. Downs. 2016. Spatiotemporal variation in resource selection of servals:  
514 insights from a landscape under heavy land-use transformation. *Journal of Mammalogy* 97: 554–567.  
515 doi:10.1093/jmammal/gyv201.
- 516 R Development Core Team. 2017. *R: A language and environment for statistical computing*. . Version  
517 3.4.3. R Foundation for statistical computing, Vienna. Available from <https://www.R-project.org/>.
- 518 Ripple, W. J., J. A. Estes, R. L. Beschta, C. C. Wilmers, E. G. Ritchie, M. Hebblewhite, J. Berger, B.  
519 Elmhagen, et al. 2014. Status and ecological effects of the world's largest carnivores. *Science* 343:  
520 1241484–1241484. doi:10.1126/science.1241484.
- 521 Ritchie, E. G., and C. N. Johnson. 2009. Predator interactions, mesopredator release and biodiversity  
522 conservation. *Ecology Letters* 12: 982–998. doi:10.1111/j.1461-0248.2009.01347.x.
- 523 Sax, D. F., and S. D. Gaines. 2003. Species diversity: from global decreases to local increases. *Trends in*  
524 *Ecology & Evolution* 18: 561–566. doi:10.1016/S0169-5347(03)00224-6.
- 525 Scott, D. M., M. J. Berg, B. A. Tolhurst, A. L. M. Chauvenet, G. C. Smith, K. Neaves, J. Lochhead, and P.  
526 J. Baker. 2014. Changes in the distribution of red foxes (*Vulpes vulpes*) in urban areas in Great  
527 Britain: findings and limitations of a media-driven nationwide survey. *PLoS One* 9: e99059.  
528 doi:10.1371/journal.pone.0099059.
- 529 Skinner, J. D., and C. T. Chimimba. 2005. *The Mammals of the Southern African Sub-region*.  
530 doi:10.1017/cbo9781107340992.
- 531 Sloan, S., B. Bertzky, and W. F. Laurance. 2016. African development corridors intersect key protected  
532 areas. *African Journal of Ecology* 55: 731–737. doi:10.1111/aje.12377.
- 533 Smallie, J. J., and T. G. O'connor. 2000. Elephant utilization of *Colophospermum mopane*: possible  
534 benefits of hedging. *African Journal of Ecology* 38: 352–359.  
535 doi:10.1046/j.1365-2028.2000.00258.x.
- 536 Sollmann, R., M. M. Furtado, B. Gardner, H. Hofer, A. T. A. Jácomo, N. M. Tôrres, and L. Silveira.  
537 2011/3. Improving density estimates for elusive carnivores: Accounting for sex-specific detection  
538 and movements using spatial capture–recapture models for jaguars in central Brazil. *Biological*  
539 *Conservation* 144: 1017–1024.

- 540 Sunquist, M., and F. Sunquist. 2002. *Wild Cats of the World*. University of Chicago Press.
- 541 Taylor, P. J. 2013. *Otomys irroratus* Southern African vlei rat. In *Mammals of Africa: Rodents, Hares and*  
542 *Rabbits*, ed. D. C. D. Happold, 583–585. London: Bloomsbury. doi:10.5040/9781472926937.0355.
- 543 Thiel, C. 2011. Ecology and population status of the Serval *Leptailurus serval* (Schreber, 1776) in  
544 Zambia. PhD Thesis, University of Bonn, Bonn.
- 545 Thiel, C. 2015. *Leptailurus serval*. *The IUCN Red List of Threatened Species 2015: e.T11638A50654625*.  
546 doi:10.2305/IUCN.UK.2015-2.RLTS.T11638A50654625.en.
- 547 Tobler, M. W., and G. V. N. Powell. 2013. Estimating jaguar densities with camera traps: Problems with  
548 current designs and recommendations for future studies. *Biological Conservation* 159: 109–118.  
549 doi:10.1016/j.biocon.2012.12.009.
- 550 United Nations Environment Programme. 2012. *Global environmental outlook 5: environment for the*  
551 *future we want*. United Nations Environment Programme, Valletta.
- 552 de Wet, F. 2016. *Veld condition assessment and management within Sasol grasslands*. EnviroPulse,  
553 Hilton.
- 554 Wiesel, I. 2010. Killing of Cape fur seal (*Arctocephalus pusillus pusillu*) pups by brown hyenas  
555 (*Parahyaena brunnea*) at mainland breeding colonies along the coastal Namib Desert. *Acta*  
556 *Ethologica* 13: 93–100. doi:10.1007/s10211-010-0078-1.
- 557 Williams, N., M. W. Schwartz, and P. A. Vesk. 2009. A conceptual framework for predicting the effects of  
558 urban environments on floras. *Journal of Ecology* 97: 4–9. doi: 10.1111/j.1365-  
559 2745.2008.01460.x.
- 560 Williams, S. T., N. Maree, P. Taylor, S. R. Belmain, M. Keith, and L. H. Swanepoel. 2018. Predation by  
561 small mammalian carnivores in rural agro-ecosystems: An undervalued ecosystem service?  
562 *Ecosystem Services*. doi:10.1016/j.ecoser.2017.12.006.
- 563 Zarfl, C., A. E. Lumsdon, J. Berlekamp, L. Tydecks, and K. Tockner. 2014. A global boom in hydropower  
564 dam construction. *Aquatic Sciences* 77: 161–170. doi:10.1007/s00027-014-0377-0.

565 **Supplementary information**

566 This will be deleted as separate image or word files, not within the manuscript.

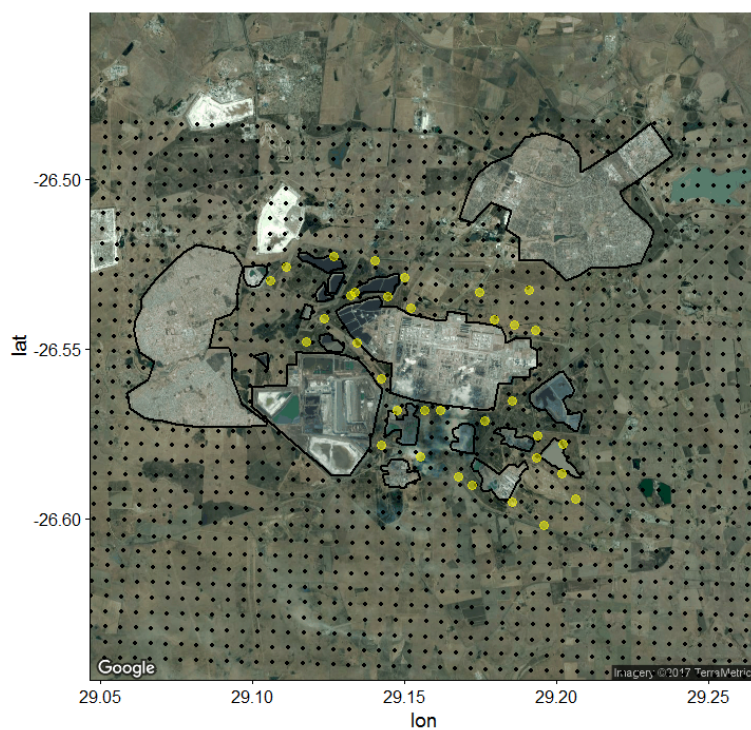

567 Fig. S1. Map showing the locations of camera traps (yellow points) and the state space (black  
568 points), illustrating the areas excluded from the state space at SSOP in South Africa.

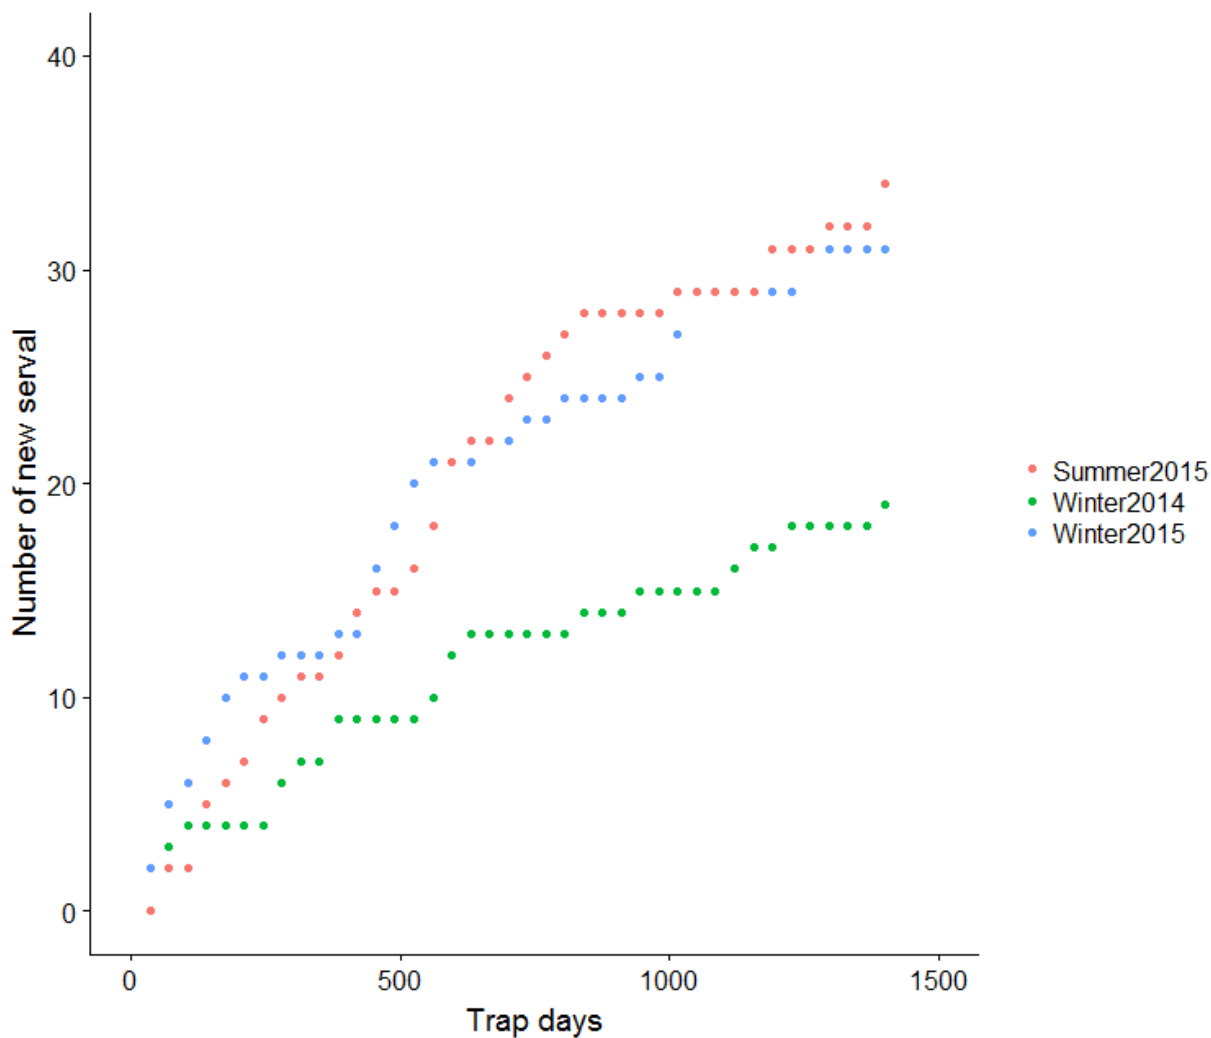

569 Fig. S2. Cumulative frequency curve showing the relationship between the cumulative number of  
570 individual serval identified on the camera traps at SSO in South Africa.

571 Table S3. Model results showing the seasonal effect on serval density at SSO.

|                        | <b>Density<br/>(individuals per<br/>100 km<sup>2</sup>)</b> | <b>Standard error</b> | <b>Lower confidence<br/>limit</b> | <b>Upper confidence<br/>limit</b> |
|------------------------|-------------------------------------------------------------|-----------------------|-----------------------------------|-----------------------------------|
| <b>Winter 2014</b>     | 111.54                                                      | 22.76                 | 75.07                             | 165.72                            |
| <b>Winter 2015</b>     | 103.06                                                      | 21.76                 | 68.44                             | 155.19                            |
| <b>Summer<br/>2015</b> | 62.33                                                       | 16.02                 | 37.96                             | 102.35                            |



Table S4. Model results showing the habitat effect on detection probability (g0). Model name: a) (Mhab.sec) models the detection probability (g0) on habitat type. b) (Mdens.habitat) models the how density is affected by season and year and account for habitat in detection probability c) (Mb.sec) models the learned response to detection d) (Mseason) models density affected by season and year. e) (m0.sec) the Null model.

| Model name    | Model specification                    | Detection Function (detectfn) | Number of parameters (npar) | Log-Likelihood (logLik) | Akaike Information Criterion(AIC) | Corrected AIC (AICc) | Difference in Corrected AIC (dAICc) | AICc model weight (AICcwt) |
|---------------|----------------------------------------|-------------------------------|-----------------------------|-------------------------|-----------------------------------|----------------------|-------------------------------------|----------------------------|
| Mhab.sec      | D~1<br>g0~Habitat<br>sigma~1 z~1       | hazard rate                   | 7                           | -1015.43                | 2044.854                          | 2046.327             | 0                                   | 0.5122                     |
| Mdens.habitat | D~session<br>g0~Habitat<br>sigma~1 z~1 | hazard rate                   | 9                           | -1013                   | 2043.993                          | 2046.425             | 0.098                               | 0.4878                     |
| Mb.sec        | D~1 g0~b<br>sigma~1 z~1                | hazard rate                   | 5                           | -1028.51                | 2067.03                           | 2067.799             | 21.472                              | 0                          |
| Mseason       | D~session<br>g0~1 sigma~1<br>z~1       | hazard rate                   | 6                           | -1030.09                | 2072.179                          | 2073.269             | 26.942                              | 0                          |
| M0.sec        | D~1 g0~1<br>sigma~1 z~1                | hazard rate                   | 4                           | -1033.59                | 2075.185                          | 2075.692             | 29.365                              | 0                          |
